# Supplementary material
Source: PubMed Central journal article supplement (PMC5073372)
Supplement: cn6b00131_si_001.pdf [file cn6b00131_si_001.pdf]

Supplemental Information

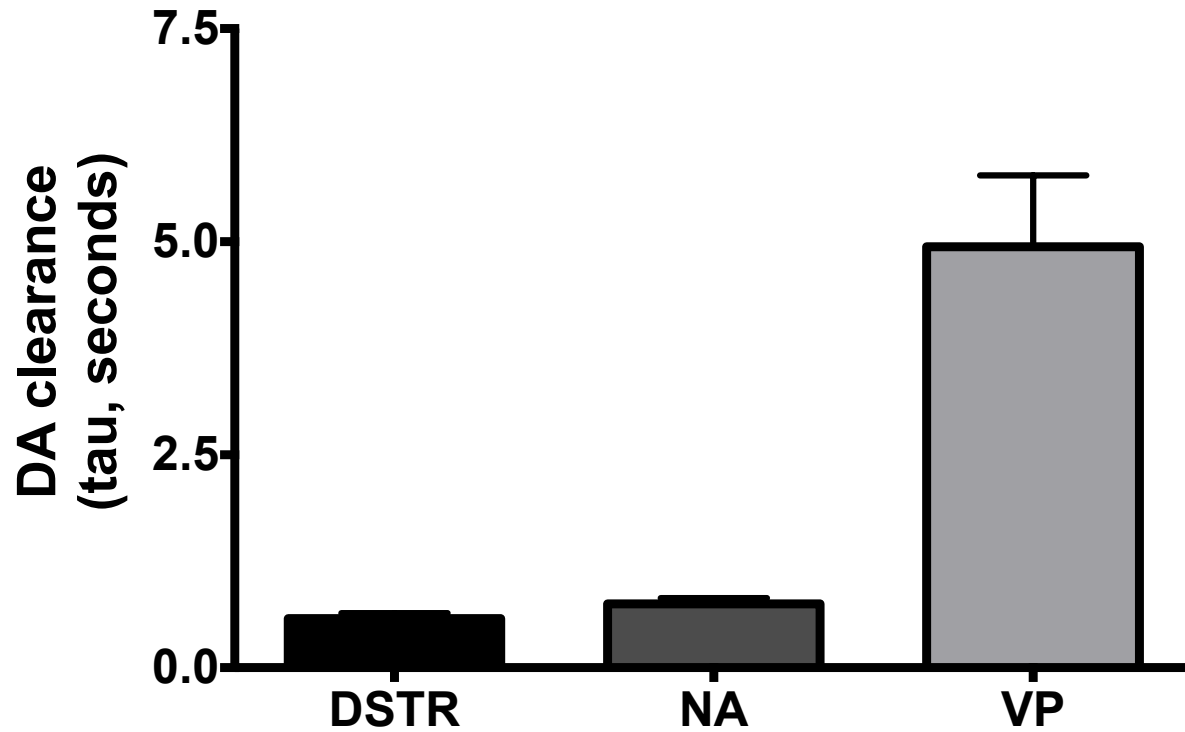

**Supplemental Figure 1 – Dopamine clearance in striatum and ventral pallidum.** Dopamine clearance is substantially slower in the ventral pallidum compared with dorsal striatum and nucleus accumbens ( $p < 0.01$ ,  $n = 8$ , one-way ANOVA with Newman-Keuls multiple comparison test).

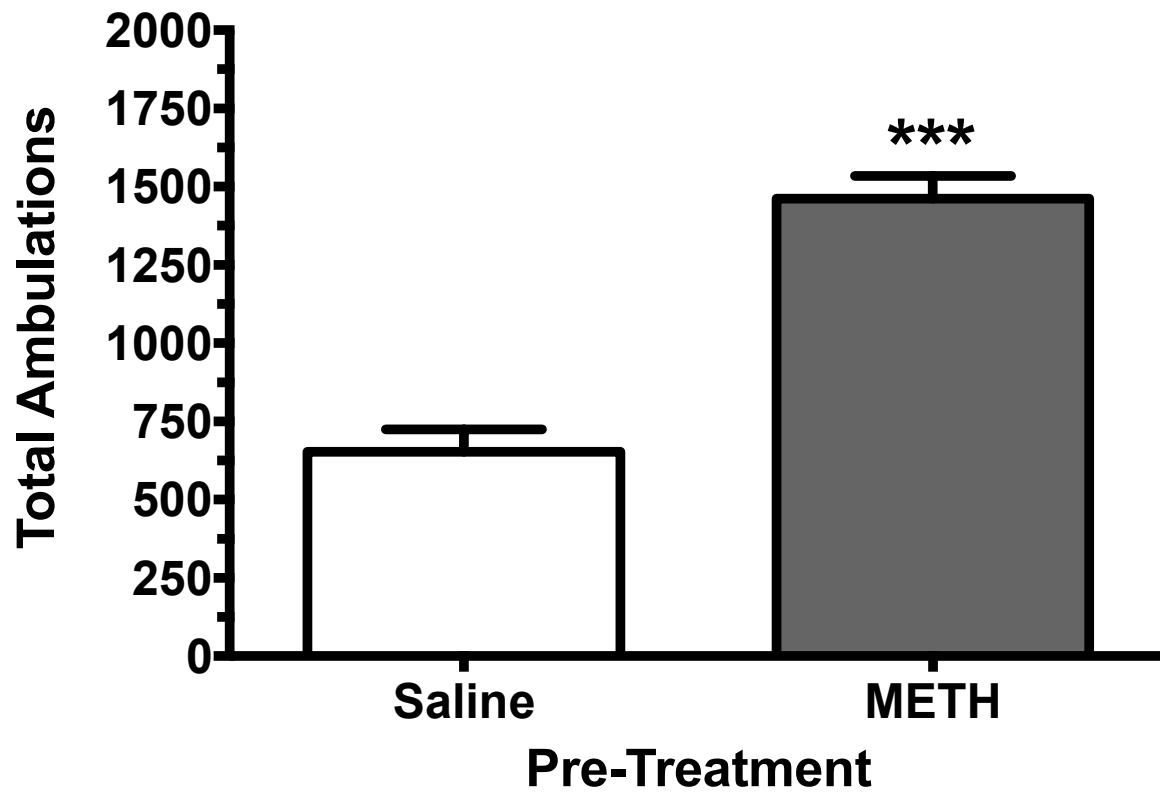

**Supplemental Figure 2 – Locomotor sensitization.** Animals were sensitized with daily injections of 2 mg/kg METH or equivalent volume saline. Following a 7-day washout, all animals received 1 mg/kg methamphetamine and ambulations were recorded (beam breaks). METH pre-treated animals exhibit a 224% increase in locomotor behavior compared with saline controls ( $p < 0.0001$ ,  $n = 21$ ).
